# Supplementary material
Source: Springer Nature journal article supplement (https://www.springermedizin.de/resource/supplementary/12885_2013_4660_MOESM1_ESM.pdf/9466790)
Supplement: MOESM1 [file 9466790]

Supplementary Table 1. Studies included in the meta-analysis for tobacco smoking in Korean men

| Author (year)              | Study period | Study subjects                                |                                                                    |                        |                                              |                       | Category of smoking     | OR (95% CI)                                                       | Confounding variables considered                            |                  |               |                              |
|----------------------------|--------------|-----------------------------------------------|--------------------------------------------------------------------|------------------------|----------------------------------------------|-----------------------|-------------------------|-------------------------------------------------------------------|-------------------------------------------------------------|------------------|---------------|------------------------------|
|                            |              | Type and source                               | Definition                                                         | Cancer site            | No. of cases                                 | No. of controls       |                         |                                                                   |                                                             |                  |               |                              |
| <b>Incidence</b>           |              |                                               |                                                                    |                        |                                              |                       |                         |                                                                   |                                                             |                  |               |                              |
| Choi SY et al. (1992) [20] | 1986-1990    | Hospital-based (Korea Cancer Center Hospital) | Cases: newly diagnosed histologically cases                        | Oral cavity & Pharynx* |                                              |                       | Never                   | 1.00                                                              |                                                             |                  |               |                              |
|                            |              |                                               |                                                                    |                        |                                              |                       | Former                  | 0.87 (0.45-1.66)                                                  |                                                             |                  |               |                              |
|                            |              |                                               | Controls: cancer-free patients at the same hospital                | Esophagus              | 139                                          | 417                   | Never                   | 1.00                                                              | Adjusted for age, marital status, education and alcohol use |                  |               |                              |
|                            |              |                                               |                                                                    |                        | Mean age                                     | 57.2                  | 57.6                    | Former                                                            |                                                             | 1.11 (0.49-2.53) |               |                              |
|                            |              |                                               | Stomach                                                            | 238                    | 714                                          | Never                 | 1.00                    | Adjusted for age, marital status, education, diet and alcohol use |                                                             |                  |               |                              |
|                            |              |                                               |                                                                    | Mean age               | 50.8                                         | 49.7                  | Former                  |                                                                   | 0.89 (0.48-1.65)                                            |                  |               |                              |
|                            |              |                                               | Rectum                                                             | 67                     | 201                                          | Never                 | 1.00                    | Adjusted for age, marital status, education, diet and alcohol use |                                                             |                  |               |                              |
|                            |              |                                               |                                                                    | Mean age               | 52.6                                         | 52.4                  | Former                  |                                                                   | 1.35 (0.53-2.28)                                            |                  |               |                              |
|                            |              |                                               | Larynx                                                             | 94                     | 282                                          | Never                 | 1.00                    | Adjusted for alcohol use                                          |                                                             |                  |               |                              |
|                            |              |                                               |                                                                    | Mean age               | 58.4                                         | 58.8                  | Former                  |                                                                   | 2.24 (0.60-8.43)                                            |                  |               |                              |
|                            |              |                                               | Lung                                                               | 280                    | 840                                          | Never                 | 1.00                    | Adjusted for alcohol use                                          |                                                             |                  |               |                              |
|                            |              |                                               |                                                                    | Mean age               | 55                                           | 53.3                  | Former                  |                                                                   | 2.06 (0.98-4.31)                                            |                  |               |                              |
|                            |              |                                               | Jee SH et al. (2004) [21]<br><i>Re-analysis using updated data</i> | 1993-2001              | National Health Insurance Corporation (NHIC) | Cohort<br>758,193 men | Oral cavity & Pharynx** | 12                                                                |                                                             | Never            | 1.0           | Adjusted for age and alcohol |
|                            |              |                                               |                                                                    |                        |                                              |                       |                         | 17                                                                |                                                             | Former           | 1.3 (0.6-2.7) |                              |
| 77                         |              | Current                                       |                                                                    |                        |                                              |                       |                         | 2.6 (1.4-4.8)                                                     |                                                             |                  |               |                              |
| Cohort<br>758,193 men      | Esophagus**  | 155                                           |                                                                    |                        |                                              |                       | Never                   | 1.0                                                               | Adjusted for age and alcohol                                |                  |               |                              |
|                            |              | 220                                           |                                                                    |                        |                                              |                       | Former                  | 1.2 (0.9-1.4)                                                     |                                                             |                  |               |                              |
|                            |              | 1,045                                         |                                                                    |                        |                                              |                       | Current                 | 2.3 (2.0-2.8)                                                     |                                                             |                  |               |                              |
| Cohort<br>758,193 men      | Stomach**    | 2,184                                         |                                                                    |                        |                                              |                       | Never                   | 1.0                                                               | Adjusted for age, alcohol and diet                          |                  |               |                              |
|                            |              | 3,046                                         |                                                                    |                        |                                              |                       | Former                  | 1.3 (1.2-1.4)                                                     |                                                             |                  |               |                              |
|                            | 30 ≤ age ≤95 | 8,850                                         |                                                                    |                        |                                              |                       | Current                 | 1.5 (1.5-16)                                                      |                                                             |                  |               |                              |

\* From meta-analysis on oral cavity and pharynx.

\*\* Additional analysis results on RR from updated dataset were obtained through personal communication with the author

Supplementary Table 1. Studies included in the meta-analysis for tobacco smoking in Korean men (continued)

| Author (year)                                                      | Study period | Study subjects                               |                            |               |                              | Category of smoking        | OR (95% CI)   | Confounding variables considered                                                                                   |
|--------------------------------------------------------------------|--------------|----------------------------------------------|----------------------------|---------------|------------------------------|----------------------------|---------------|--------------------------------------------------------------------------------------------------------------------|
|                                                                    |              | Type and source                              | Definition                 | Cancer site   | No. of cases                 |                            |               |                                                                                                                    |
| Jee SH et al. (2004) [21]<br><i>Re-analysis using updated data</i> | 1993-2001    | National Health Insurance Corporation (NHIC) | Cohort<br>830,139 men      | Colon         | 342                          | Never<br>Former<br>Current | 1.0           | Adjusted for age                                                                                                   |
|                                                                    |              |                                              |                            | 30 ≤ age ≤95  | 509                          |                            | 1.1 (1.0-1.3) |                                                                                                                    |
|                                                                    |              |                                              |                            | 782           | 0.8 (0.7-1.0)                |                            |               |                                                                                                                    |
|                                                                    |              |                                              | Cohort<br>441,883 men      | Liver*        | 963                          | Never<br>Former<br>Current | 1.0           | Adjusted for age, alcohol and HBV                                                                                  |
|                                                                    |              |                                              |                            | 30 ≤ age ≤95  | 1,131                        |                            | 1.2 (1.1-1.3) |                                                                                                                    |
|                                                                    |              |                                              |                            | 3,520         | 1.4 (1.3-1.5)                |                            |               |                                                                                                                    |
|                                                                    |              |                                              | Cohort<br>758,193 men      | Pancreas*     | 299                          | Never<br>Former<br>Current | 1.0           | Adjusted for age and alcohol                                                                                       |
|                                                                    |              |                                              |                            | 30 ≤ age ≤95  | 385                          |                            | 1.2 (1.0-1.4) |                                                                                                                    |
|                                                                    |              |                                              |                            | 1,126         | 1.5 (1.3-1.7)                |                            |               |                                                                                                                    |
|                                                                    |              |                                              | Cohort<br>758,193 men      | Larynx*       | 58                           | Never<br>Former<br>Current | 1.0           | Adjusted for age and alcohol                                                                                       |
|                                                                    |              |                                              |                            | 30 ≤ age ≤95  | 137                          |                            | 2.0 (1.5-2.8) |                                                                                                                    |
|                                                                    |              |                                              |                            | 722           | 4.6 (3.6-6.1)                |                            |               |                                                                                                                    |
| Cohort<br>758,193 men                                              | Lung*        | 758                                          | Never<br>Former<br>Current | 1.0           | Adjusted for age and alcohol |                            |               |                                                                                                                    |
|                                                                    | 30 ≤ age ≤95 | 1,332                                        |                            | 1.6 (1.4-1.7) |                              |                            |               |                                                                                                                    |
|                                                                    | 6,657        | 3.7 (3.4-4.0)                                |                            |               |                              |                            |               |                                                                                                                    |
| Cohort<br>758,193 men                                              | Kidney*      | 270                                          | Never<br>Former<br>Current | 1.0           | Adjusted for age and alcohol |                            |               |                                                                                                                    |
|                                                                    | 30 ≤ age ≤95 | 302                                          |                            | 1.1 (0.9-1.2) |                              |                            |               |                                                                                                                    |
|                                                                    | 769          | 1.1 (0.9-1.2)                                |                            |               |                              |                            |               |                                                                                                                    |
| Cohort<br>758,193 men                                              | Bladder*     | 275                                          | Never<br>Former<br>Current | 1.0           | Adjusted for age and alcohol |                            |               |                                                                                                                    |
|                                                                    | 30 ≤ age ≤95 | 442                                          |                            | 1.5 (1.3-1.7) |                              |                            |               |                                                                                                                    |
|                                                                    | 1,348        | 2.0 (1.7-2.3)                                |                            |               |                              |                            |               |                                                                                                                    |
| Kimm H et al. (2010) [26]                                          | 1993-2006    | Korean Cancer Prevention Study (KCPS)        | Cohort<br>782,632 men      | Esophagus     | 150                          | Never<br>Former<br>Current | 1.0           | Adjusted for age, age <sup>2</sup> , alcohol intake, aspartate aminotransferase(GOT), body mass index and exercise |
|                                                                    |              |                                              |                            | 30 ≤ age ≤93  | 224                          |                            | 1.2 (1.0-1.4) |                                                                                                                    |
|                                                                    |              |                                              |                            | 1,009         | 2.2 (1.8-2.5)                |                            |               |                                                                                                                    |

\* Additional analysis results on RR from updated dataset were obtained through personal communication with the author

Supplementary Table 1. Studies included in the meta-analysis for tobacco smoking in Korean men (continued)

| Author (year)              | Study period | Study subjects                                                    |                                                                                                                                                 |                             |                   |                   | Category of smoking        | OR (95% CI)                                  | Confounding variables considered                                                                                                           |
|----------------------------|--------------|-------------------------------------------------------------------|-------------------------------------------------------------------------------------------------------------------------------------------------|-----------------------------|-------------------|-------------------|----------------------------|----------------------------------------------|--------------------------------------------------------------------------------------------------------------------------------------------|
|                            |              | Type and source                                                   | Definition                                                                                                                                      | Cancer site                 | No. of cases      | No. of controls   |                            |                                              |                                                                                                                                            |
| Kim J et al. (2012) [23]   | 2003-2007    | Hospital-based (National Cancer Center)                           | Cases: patients with noncardia gastric cancer                                                                                                   | Stomach                     | 183<br>108<br>204 | 208<br>158<br>129 | Never<br>Former<br>Current | 1.00<br>0.78 (0.56-1.08)<br>1.80 (1.32-2.45) | Matched by age(±5) and sex                                                                                                                 |
|                            |              |                                                                   | Controls: healthy controls who underwent upper endoscopy for gastric cancer screening and were without significant gastrointestinal symptoms    | Mean age                    | 54.9±8.4          | 54.3±7.4          |                            |                                              |                                                                                                                                            |
| Yang JJ et al. (2009) [34] | 2002         | Korean Multi-Center Cancer Cohort (KMCC)                          | Cases: patients signed a consent form and completed a detailed standardized interview-based questionnaire                                       | Stomach<br><br>40 ≤ age ≤83 | 26<br>21<br>37    | 141<br>82<br>111  | Never<br>Former<br>Current | 1.0<br>1.4 (0.8-2.6)<br>1.8 (1.0-3.2)        | Matched by age(±5), sex, residential district and enrollment year<br><br>Adjusted for H.pylori infection, CagA seropositivity, age and sex |
| Lee JK et al. (1995) [28]  | 1990-1991    | Hospital-based (Hanyang University Hospital, Asan Medical Center) | Cases: patients hospitalized in the surgical wards of two teaching hospitals<br><br>Controls: hospitalized patients with wide range of problems | Stomach<br><br>25 ≤ age ≤65 | 82<br>49<br>82    | 107<br>42<br>63   | Never<br>Former<br>Current | 1.0<br>3.0 (1.4-6.2)<br>3.4 (1.7-6.8)        | Matched by age(±2) and sex<br><br>Adjusted for age, sex, education, economic status and residence                                          |

Supplementary Table 1. Studies included in the meta-analysis for tobacco smoking in Korean men (continued)

| Author (year)              | Study period | Study subjects                                          |                                                                                                         |                               |                       |                       | Category of smoking | OR (95% CI)       | Confounding variables considered |
|----------------------------|--------------|---------------------------------------------------------|---------------------------------------------------------------------------------------------------------|-------------------------------|-----------------------|-----------------------|---------------------|-------------------|----------------------------------|
|                            |              | Type and source                                         | Definition                                                                                              | Cancer site                   | No. of cases          | No. of controls       |                     |                   |                                  |
| Kim J et al. (2009) [24]   | 2001-2004    | Hospital-based (Two university hospitals)               | Cases: reconfirmed from both pathology report and chart review                                          | Colorectum                    | 86                    | 84                    | Never               | 1.00              | Matched by age                   |
|                            |              |                                                         |                                                                                                         | 30 ≤ age ≤79                  | 100                   | 80                    | Former              | 1.22 (0.78-1.90)  |                                  |
|                            |              |                                                         | Controls: had been hospitalized during the same period for a wide spectrum of non-neoplastic conditions |                               | 176                   | 106                   | Current             | 1.62 (1.08-2.43)  |                                  |
| Shin A et al. (2011) [33]  | 1996-1997    | Korean national Health System (KNHS)                    | Cohort<br>869,725 men                                                                                   | Colorectum*                   |                       |                       | Never               | 1.00              |                                  |
|                            |              |                                                         |                                                                                                         | 30 ≤ age ≤80                  |                       |                       | Former              | 1.18 (0.96-1.44)  |                                  |
|                            |              |                                                         |                                                                                                         |                               |                       |                       | Current             | 0.98 (0.90-1.07)  |                                  |
| Park JY et al. (2002) [30] | 1997-2000    | Hospital-based (Kyungpook National University Hospital) | Cases: diagnosed with lung cancer                                                                       | Lung                          | 2                     | 3                     | Never               | 1.00              | Matched by age(±5)               |
|                            |              |                                                         |                                                                                                         |                               | 6                     | 37                    | Former              | 0.24 (0.02-3.62)  |                                  |
|                            |              |                                                         | Controls: randomly selected from a pool of healthy volunteers                                           | Mean age                      | 61.2±8.4              | 60.7±8.4              | Current             | 2.91 (0.33-35.19) |                                  |
| Choi JE et al. (2009) [19] | 2001-2002    | Hospital-based (Kyungpook National University Hospital) | Cases: lung cancer patients                                                                             | Lung                          | 141                   | 198                   | Never               | 1.00              | Matched by age(±5) and sex       |
|                            |              |                                                         |                                                                                                         |                               | 116                   | 191                   | Former              | 0.85 (0.61-1.18)  |                                  |
|                            |              |                                                         | Controls: randomly selected from a pool of healthy volunteers                                           | Mean age                      | 61.3±8.8              | 60.6±9.3              | Current             | 1.96 (1.51-2.56)  |                                  |
| Kim JS et al. (2010) [25]  | 2001-2004    | Hospital-based (Kyungpook National University Hospital) | Cases: lung cancer patients                                                                             | Lung**                        |                       |                       | Never               | 1.00              |                                  |
|                            |              |                                                         |                                                                                                         |                               |                       |                       | Former              | 0.51 (0.12-2.09)  |                                  |
|                            |              |                                                         | Controls: healthy volunteers who visited the general health check-up center                             | Mean age:<br>Stage1<br>Stage2 | 61.5±10.9<br>60.9±8.5 | 61.5±11.3<br>60.5±9.0 | Current             | 1.83 (1.37-2.44)  |                                  |

\* Meta-analysis of RRs for proximal colon, distal colon, and rectum

\*\* Meta-analysis of R

Supplementary Table 1. Studies included in the meta-analysis for tobacco smoking in Korean men (continued)

| Author (year)                                               | Study period | Study subjects                                                                                           |                                                                                                           |                         |              |                 | Category of smoking | OR (95% CI)      | Confounding variables considered              |
|-------------------------------------------------------------|--------------|----------------------------------------------------------------------------------------------------------|-----------------------------------------------------------------------------------------------------------|-------------------------|--------------|-----------------|---------------------|------------------|-----------------------------------------------|
|                                                             |              | Type and source                                                                                          | Definition                                                                                                | Cancer site             | No. of cases | No. of controls |                     |                  |                                               |
| Yoon KA et al. (2007) [36]                                  | 2002-2003    | Hospital-based (National Cancer Center)                                                                  | Cases: patients with histologically confirmed lung cancer                                                 | Lung                    | 116          | 139             | Never               | 1.00             | Matched by age(±3) and sex                    |
|                                                             |              |                                                                                                          |                                                                                                           |                         | 75           | 103             | Former              | 0.87 (0.58-1.31) |                                               |
|                                                             |              |                                                                                                          | Controls: without a prior history of cancer were recruited from the visitors for cancer-screening program | age range               | 25≤age≤70    | 28≤age≤73       | Current             | 1.99 (1.36-2.91) |                                               |
| Park SK et al. * (2010) [31]<br>Re-analysis                 | 1997-1998    | Korean Academy of Tuberculosis and Respiratory Diseases (KATRD) Korean Multi-Center Cancer Cohort (KMCC) | Cases: histologically confirmed incident lung cancer cases diagnosed in 1997 were registered in the KATRD | Lung                    | 104          | 101             | Never               | 1.00             | Matched by age(≤44, 45-69, and ≥70 years old) |
|                                                             |              |                                                                                                          |                                                                                                           | 44 ≤ age ≤70            | 158          | 90              | Former              | 1.72 (1.18-2.51) |                                               |
|                                                             |              |                                                                                                          | Controls: cancer free when registered in 1997 in Chungju, a site of the KMCC                              |                         | 619          | 261             | Current             | 2.31 (1.70-3.16) | Adjusted for age                              |
| <b>Mortality</b>                                            |              |                                                                                                          |                                                                                                           |                         |              |                 |                     |                  |                                               |
| Jee SH et al. (2004) [21]<br>Re-analysis using updated data | 1993-2001    | National Health Insurance Corporation (NHIC)                                                             | Cohort                                                                                                    | Oral cavity & Pharynx** | 1            |                 | Never               | 1.0              | Adjusted for age and alcohol                  |
|                                                             |              |                                                                                                          | 758,193 men                                                                                               |                         | 1            |                 | Former              | 0.8 (0.1-13.5)   |                                               |
|                                                             |              |                                                                                                          |                                                                                                           |                         | 10           |                 | Current             | 3.3 (0.5-34.6)   |                                               |
|                                                             |              |                                                                                                          |                                                                                                           | 30 ≤ age ≤95            |              |                 |                     |                  |                                               |
|                                                             |              |                                                                                                          | Cohort                                                                                                    | Esophagus**             | 80           |                 | Never               | 1.0              | Adjusted for age and alcohol                  |
|                                                             |              |                                                                                                          | 758,193 men                                                                                               |                         | 140          |                 | Former              | 1.4 (1.1-1.8)    |                                               |
|                                                             |              |                                                                                                          |                                                                                                           | 30 ≤ age ≤95            | 630          |                 | Current             | 2.8 (2.2-3.5)    |                                               |
|                                                             |              |                                                                                                          | Cohort                                                                                                    | Stomach**               | 830          |                 | Never               | 1.0              | Adjusted for age, alcohol and diet            |
|                                                             |              |                                                                                                          | 758,193 men                                                                                               |                         | 1,201        |                 | Former              | 1.3 (1.2-1.4)    |                                               |
|                                                             |              |                                                                                                          |                                                                                                           | 30 ≤ age ≤95            | 3,305        |                 | Current             | 1.6 (1.5-1.7)    |                                               |
|                                                             |              |                                                                                                          | Cohort                                                                                                    | Colon                   | 91           |                 | Never               | 1.0              | Adjusted for age                              |
|                                                             |              |                                                                                                          | 830,139 men                                                                                               |                         | 139          |                 | Former              | 1.1 (0.9-1.4)    |                                               |
|                                                             |              |                                                                                                          |                                                                                                           | 30 ≤ age ≤95            | 281          |                 | Current             | 1.1 (0.8-1.4)    |                                               |

\* Additional analysis results on RR from dataset were obtained through personal communication with the author

\*\* Additional analysis results on RR from updated dataset were obtained through personal communication with the author

Supplementary Table 1. Studies included in the meta-analysis for tobacco smoking in Korean men (continued)

| Author (year)                                                      | Study period | Study subjects                               |                            |                                       |              | Category of smoking        | OR (95% CI)                           | Confounding variables considered                                                                                   |
|--------------------------------------------------------------------|--------------|----------------------------------------------|----------------------------|---------------------------------------|--------------|----------------------------|---------------------------------------|--------------------------------------------------------------------------------------------------------------------|
|                                                                    |              | Type and source                              | Definition                 | Cancer site                           | No. of cases |                            |                                       |                                                                                                                    |
| Jee SH et al. (2004) [21]<br><i>Re-analysis using updated data</i> | 1993-2001    | National Health Insurance Corporation (NHIC) | Cohort<br>441,883 men      | Liver*                                | 573          | Never<br>Former<br>Current | 1.0<br>1.2 (1.0-1.3)<br>1.4 (1.3-1.6) | Adjusted for age, alcohol and HBV                                                                                  |
|                                                                    |              |                                              |                            | 30 ≤ age ≤95                          | 2,162        |                            |                                       |                                                                                                                    |
|                                                                    |              |                                              |                            | Cohort<br>758,193 men                 | Pancreas*    |                            |                                       |                                                                                                                    |
|                                                                    |              |                                              | Cohort<br>758,193 men      | Larynx*                               | 20           | Never<br>Former<br>Current | 1.0<br>1.7 (1.0-2.9)<br>4.5 (2.8-7.1) |                                                                                                                    |
|                                                                    |              |                                              |                            | 30 ≤ age ≤95                          | 41<br>228    |                            |                                       |                                                                                                                    |
|                                                                    |              |                                              | Cohort<br>758,193 men      | Lung*                                 | 423          | Never<br>Former<br>Current | 1.0<br>1.8 (1.6-2.0)<br>4.4 (4.0-4.9) |                                                                                                                    |
| 30 ≤ age ≤95                                                       | 871<br>4,381 |                                              |                            |                                       |              |                            |                                       |                                                                                                                    |
| Cohort<br>758,193 men                                              | Kidney*      | 52                                           | Never<br>Former<br>Current | 1.0<br>1.0 (0.7-1.4)<br>1.1 (0.8-1.5) |              |                            |                                       |                                                                                                                    |
|                                                                    |              | 30 ≤ age ≤95                                 |                            |                                       | 58<br>146    |                            |                                       |                                                                                                                    |
| Cohort<br>758,193 men                                              | Bladder*     | 39                                           | Never<br>Former<br>Current | 1.0<br>1.3 (0.9-1.9)<br>2.1 (1.4-2.9) |              |                            |                                       |                                                                                                                    |
|                                                                    |              | 30 ≤ age ≤95                                 |                            |                                       | 58<br>176    |                            |                                       |                                                                                                                    |
| Kimm H et al. (2010) [26]                                          | 1993-2006    | Korean Cancer Prevention Study (KCPS)        | Cohort<br>782,632 men      | Esophagus                             | 92           | Never<br>Former<br>Current | 1.0<br>1.5 (1.2-2.0)<br>2.5 (2.0-3.1) | Adjusted for age, age <sup>2</sup> , alcohol intake, aspartate aminotransferase(GOT), body mass index and exercise |
|                                                                    |              |                                              |                            | 30 ≤ age ≤93                          | 183<br>721   |                            |                                       |                                                                                                                    |

\* Additional analysis results on RR from updated dataset were obtained through personal communication with the author

Supplementary Table 1. Studies included in the meta-analysis for tobacco smoking in Korean men (continued)

| Author (year)                              | Study period | Study subjects                           |                     |                  |                   | Category of smoking | OR (95% CI)       | Confounding variables considered                                 |
|--------------------------------------------|--------------|------------------------------------------|---------------------|------------------|-------------------|---------------------|-------------------|------------------------------------------------------------------|
|                                            |              | Type and source                          | Definition          | Cancer site      | No. of cases      |                     |                   |                                                                  |
| Lee EH et al. * (2010) [27]<br>Re-analysis | 1993-2004    | Korean Multi-Center Cancer Cohort (KMCC) | Cohort<br>5,287 men | Stomach          | 6                 | Never               | 1.00              | Adjusted for age, body mass index and alcohol consumption amount |
|                                            |              |                                          |                     | 40 ≤ age         | 22                | Former              | 3.10 (1.25-7.66)  |                                                                  |
|                                            |              |                                          |                     | 42               | Current           | 2.41 (1.02-5.70)    |                   |                                                                  |
|                                            |              |                                          | Cohort<br>5,287 men | Pancreas         | 2                 | Never               | 1.00              |                                                                  |
|                                            |              |                                          |                     | 40 ≤ age         | 6                 | Former              | 2.44 (0.49-12.26) |                                                                  |
|                                            |              |                                          |                     | 6                | Current           | 1.21 (0.24-6.12)    |                   |                                                                  |
| Cohort<br>5,287 men                        | Lung         | 5                                        | Never               | 1.00             |                   |                     |                   |                                                                  |
|                                            | 40 ≤ age     | 21                                       | Former              | 3.54 (1.33-9.41) |                   |                     |                   |                                                                  |
|                                            |              |                                          | 62                  | Current          | 4.48 (1.80-11.19) |                     |                   |                                                                  |

\* Additional analysis results on RR from dataset were obtained through personal communication with the author

Supplementary Table 2. Studies included in the meta-analysis for tobacco smoking in Korean women

| Author (year)                                                        | Study period | Study subjects                                |                                                                                                                      |                         |                |                              | Category of smoking | RR (95% CI)                          | Confounding variables considered            |                                   |  |  |
|----------------------------------------------------------------------|--------------|-----------------------------------------------|----------------------------------------------------------------------------------------------------------------------|-------------------------|----------------|------------------------------|---------------------|--------------------------------------|---------------------------------------------|-----------------------------------|--|--|
|                                                                      |              | Type and source                               | Definition                                                                                                           | Cancer site             | No. of cases   | No. of controls              |                     |                                      |                                             |                                   |  |  |
| <b>Incidence</b>                                                     |              |                                               |                                                                                                                      |                         |                |                              |                     |                                      |                                             |                                   |  |  |
| Choi SY et al. (1992) [20]                                           | 1986-1990    | Hospital-based (Korea Cancer Center Hospital) | Cases: newly diagnosed and histologically confirmed cases<br><br>Controls: cancer-free patients at the same hospital | Cervix                  | 271            | 813                          | Never               | 1.00                                 | Adjusted for marital status and alcohol use |                                   |  |  |
|                                                                      |              |                                               |                                                                                                                      | Mean age                | 46.8           | 46.6                         | Former<br>Current   | 2.52 (0.84-7.62)<br>0.77 (0.45-1.31) |                                             |                                   |  |  |
| Jee SH et al. * (2004) [21]<br><i>Re-analysis using updated data</i> | 1993-2001    | National Health Insurance Corporation (NHIC)  | Cohort<br>434,145 women                                                                                              | Oral cavity & Pharynx   | 8              |                              | Never               | 1.0                                  | Adjusted for age and alcohol                |                                   |  |  |
|                                                                      |              |                                               |                                                                                                                      |                         | 0              |                              | Former              | -                                    |                                             |                                   |  |  |
|                                                                      |              |                                               |                                                                                                                      |                         | 2              |                              | Current             | 6.7 (1.1-39.4)                       |                                             |                                   |  |  |
|                                                                      |              |                                               |                                                                                                                      |                         |                | 30 ≤ age ≤95                 |                     |                                      |                                             |                                   |  |  |
|                                                                      |              |                                               |                                                                                                                      | Cohort<br>434,145 women | Esophagus      | Never                        | 69                  |                                      | 1.0                                         | Adjusted for age and alcohol      |  |  |
|                                                                      |              |                                               |                                                                                                                      |                         |                | Former                       | 4                   |                                      | 1.1 (0.4-3.1)                               |                                   |  |  |
|                                                                      |              |                                               |                                                                                                                      |                         |                | Current                      | 11                  |                                      | 1.6 (0.8-3.1)                               |                                   |  |  |
|                                                                      |              |                                               |                                                                                                                      |                         |                | 30 ≤ age ≤95                 |                     |                                      |                                             |                                   |  |  |
|                                                                      |              |                                               |                                                                                                                      | Cohort<br>121,822 women | Liver          | Never                        | 223                 |                                      | 1.0                                         | Adjusted for age, alcohol and HBV |  |  |
|                                                                      |              |                                               |                                                                                                                      |                         |                | Former                       | 1                   |                                      | 0.8 (0.1-5.6)                               |                                   |  |  |
|                                                                      |              |                                               |                                                                                                                      |                         |                | Current                      | 5                   |                                      | 2.5 (1.0-6.3)                               |                                   |  |  |
|                                                                      |              |                                               |                                                                                                                      |                         |                | 30 ≤ age ≤95                 |                     |                                      |                                             |                                   |  |  |
|                                                                      |              |                                               |                                                                                                                      | Cohort<br>434,145 women | Pancreas       | Never                        | 678                 |                                      | 1.0                                         | Adjusted for age and alcohol      |  |  |
|                                                                      |              |                                               |                                                                                                                      |                         |                | Former                       | 27                  |                                      | 0.8 (0.5-1.1)                               |                                   |  |  |
| Current                                                              | 75           |                                               | 1.2 (0.9-1.5)                                                                                                        |                         |                |                              |                     |                                      |                                             |                                   |  |  |
|                                                                      |              | 30 ≤ age ≤95                                  |                                                                                                                      |                         |                |                              |                     |                                      |                                             |                                   |  |  |
| Cohort<br>434,145 women                                              | Larynx       | Never                                         | 28                                                                                                                   |                         | 1.0            | Adjusted for age and alcohol |                     |                                      |                                             |                                   |  |  |
|                                                                      |              | Former                                        | 1                                                                                                                    |                         | 0.9 (0.1-6.8)  |                              |                     |                                      |                                             |                                   |  |  |
|                                                                      |              | Current                                       | 19                                                                                                                   |                         | 9.1 (4.6-17.8) |                              |                     |                                      |                                             |                                   |  |  |
|                                                                      |              | 30 ≤ age ≤95                                  |                                                                                                                      |                         |                |                              |                     |                                      |                                             |                                   |  |  |
| Cohort<br>434,145 women                                              | Lung         | Never                                         | 1,709                                                                                                                |                         | 1.0            | Adjusted for age and alcohol |                     |                                      |                                             |                                   |  |  |
|                                                                      |              | Former                                        | 119                                                                                                                  |                         | 1.6 (1.3-1.9)  |                              |                     |                                      |                                             |                                   |  |  |
|                                                                      |              | Current                                       | 317                                                                                                                  |                         | 2.3 (2.0-2.6)  |                              |                     |                                      |                                             |                                   |  |  |
|                                                                      |              | 30 ≤ age ≤95                                  |                                                                                                                      |                         |                |                              |                     |                                      |                                             |                                   |  |  |
| Cohort<br>434,145 women                                              | Cervix       | Never                                         | 2,117                                                                                                                |                         | 1.0            | Adjusted for age and alcohol |                     |                                      |                                             |                                   |  |  |
|                                                                      |              | Former                                        | 42                                                                                                                   |                         | 1.0 (0.7-1.3)  |                              |                     |                                      |                                             |                                   |  |  |
|                                                                      |              | Current                                       | 100                                                                                                                  |                         | 1.1 (0.9-1.4)  |                              |                     |                                      |                                             |                                   |  |  |
|                                                                      |              | 30 ≤ age ≤95                                  |                                                                                                                      |                         |                |                              |                     |                                      |                                             |                                   |  |  |

\* Additional analysis results on RR from updated dataset were obtained through personal communication with the author



Supplementary Table 2. Studies included in the meta-analysis for tobacco smoking in Korean women (continued)

| Author (year)                                                           | Study period | Study subjects                                                  |                                                                                                           |              |               |                 | Category of smoking | RR (95% CI)                                   | Confounding variables considered |                  |
|-------------------------------------------------------------------------|--------------|-----------------------------------------------------------------|-----------------------------------------------------------------------------------------------------------|--------------|---------------|-----------------|---------------------|-----------------------------------------------|----------------------------------|------------------|
|                                                                         |              | Type and source                                                 | Definition                                                                                                | Cancer site  | No. of cases  | No. of controls |                     |                                               |                                  |                  |
| Jee SH et al. *<br>(2004) [21]<br><i>Re-analysis using updated data</i> | 1993-2001    | National Health Insurance Corporation (NHIC)                    | Cohort                                                                                                    | Kidney       | 307           | Never           | 1.0                 | Adjusted for age and alcohol                  |                                  |                  |
|                                                                         |              |                                                                 | 434,145 women                                                                                             |              | 10            |                 | Former              |                                               | 1.1 (0.6-2.1)                    |                  |
|                                                                         |              |                                                                 | 30 ≤ age ≤95                                                                                              |              | 16            |                 | Current             |                                               | 1.0 (0.6-1.6)                    |                  |
|                                                                         |              |                                                                 | Cohort                                                                                                    | Bladder      | 253           | Never           | 1.0                 | Adjusted for age and alcohol                  |                                  |                  |
|                                                                         |              |                                                                 | 434,145 women                                                                                             |              | 9             |                 | Former              |                                               | 0.8 (0.4-1.7)                    |                  |
|                                                                         |              |                                                                 | 30 ≤ age ≤95                                                                                              |              | 35            |                 | Current             |                                               | 1.8 (1.2-2.6)                    |                  |
| Kim J et al.<br>(2009) [24]                                             | 2001-2004    | Hospital-based (Two university hospitals)                       | Cases: reconfirmed from both pathology report and chart review                                            | Colorectum   | 216           | Never           | 1.00                | Matched by age                                |                                  |                  |
|                                                                         |              |                                                                 |                                                                                                           |              | 12            |                 | 6                   |                                               | Former                           | 2.12 (0.72-7.00) |
|                                                                         |              |                                                                 |                                                                                                           |              | 7             |                 | 4                   |                                               | Current                          | 1.86 (0.46-8.75) |
|                                                                         |              |                                                                 | Controls: had been hospitalized during the same period for a wide spectrum of non-neoplastic conditions   | 30 ≤ age ≤79 |               |                 |                     |                                               |                                  |                  |
| Shin A et al.<br>(2011) [33]                                            | 1996-1997    | Korean national Health System (KNHS)                            | Cohort                                                                                                    | Colorectum** | 395,501 women | Never           | 1.00                |                                               |                                  |                  |
|                                                                         |              |                                                                 |                                                                                                           |              |               |                 | 30 ≤ age ≤80        |                                               | Former                           | 0.96 (0.61-1.51) |
|                                                                         |              |                                                                 |                                                                                                           |              |               | Current         | 0.96 (0.75-1.23)    |                                               |                                  |                  |
| Park SK et al. *<br>(2010) [31]<br><i>Re-analysis</i>                   | 1997-1998    | Korean Academy of Tuberculosis and Respiratory Diseases (KATRD) | Cases: histologically confirmed incident lung cancer cases diagnosed in 1997 were registered in the KATRD | Lung         | 499           | Never           | 1.00                | Matched by age(≤44, 45-69, and ≥70 years old) |                                  |                  |
|                                                                         |              |                                                                 |                                                                                                           |              | 20            |                 | 8                   |                                               | Former                           | 2.96 (1.29-6.81) |
|                                                                         |              |                                                                 |                                                                                                           |              | 101           |                 | 39                  |                                               | Current                          | 3.06 (2.06-4.55) |
|                                                                         |              | Korean Multi-Center Cancer Cohort (KMCC)                        | Controls: cancer free when registered in 1997 in Chungju, a site of the KMCC                              | 44 ≤ age ≤70 |               |                 |                     | Adjusted for age                              |                                  |                  |

\* Additional analysis results on RR from updated dataset were obtained through personal communication with the author

\*\* Meta-analysis of RRs for proximal colon, distal colon, and rectum

Supplementary Table 2. Studies included in the meta-analysis for tobacco smoking in Korean women (continued)

| Author (year)                                                       | Study period | Study subjects                                 |                                                                                                                                                       |             |              |                 | Category of smoking | RR (95% CI)       | Confounding variables considered |
|---------------------------------------------------------------------|--------------|------------------------------------------------|-------------------------------------------------------------------------------------------------------------------------------------------------------|-------------|--------------|-----------------|---------------------|-------------------|----------------------------------|
|                                                                     |              | Type and source                                | Definition                                                                                                                                            | Cancer site | No. of cases | No. of controls |                     |                   |                                  |
| Cho H et al. (2009) [18]                                            | 2006-2007    | Hospital-based (six academic medical centers)  | Cases: invasive cervical cancer patients                                                                                                              | Cervix      | 140          | 343             | Never               | 1.00              |                                  |
|                                                                     |              |                                                |                                                                                                                                                       |             | 6            | 12              | Former              | 1.23 (0.37-3.61)  |                                  |
|                                                                     |              |                                                | Controls: healthy women who had no history of an abnormal Pap smear and normal Pap smear on the day of recruitment                                    | Mean age    | 51.5±12.2    | 46.8±10.1       | Current             | 1.49 (0.69-3.12)  |                                  |
| Yoo KY et al.* (1997) [35]<br><i>Re-analysis using updated data</i> | 1992-1995    | Seoul National University Hospital             | Cases: Histologically confirmed cases of invasive cervical cancer were selected from the Department of Gynecology, Seoul National University Hospital | Cervix      | 167          | 738             | Never               | 1.00              |                                  |
|                                                                     |              |                                                |                                                                                                                                                       |             | 7            | 8               | Former              | 2.78 (0.93-8.36)  |                                  |
|                                                                     |              |                                                |                                                                                                                                                       |             | 10           | 22              | Current             | 2.21 (0.99-4.95)  |                                  |
|                                                                     |              |                                                | Controls: Women with normal pap smear tests and women free of past history of any Malignancies                                                        |             |              |                 |                     |                   |                                  |
| Ma SH et al. (2012) [29]<br><i>Re-analysis using updated data</i>   | 2009-ongoing | Korea Epithelial Ovarian Cancer Study (Ko-Eve) | Cases: newly diagnosed histologically epithelial ovarian cancer cases                                                                                 | Ovary       | 892          | 165             | Never               | 1.00              | Adjusted for all variables       |
|                                                                     |              |                                                |                                                                                                                                                       |             | 7            | 5               | Former              | 2.68 (0.49-14.56) |                                  |
|                                                                     |              |                                                |                                                                                                                                                       |             | 2            | 3               | Current             | 0.96 (0.18-5.02)  |                                  |
|                                                                     |              |                                                | Controls: ovarian cancer-free population lived in the community                                                                                       |             |              |                 |                     |                   |                                  |

\* Additional analysis results on RR from dataset were obtained through personal communication with the author

Supplementary Table 2. Studies included in the meta-analysis for tobacco smoking in Korean women (continued)

| Author (year)                                                        | Study period | Study subjects                                           |                                             |                                                                                     |                    |                 | Category of smoking        | RR (95% CI)                             | Confounding variables considered                                                                                                          |
|----------------------------------------------------------------------|--------------|----------------------------------------------------------|---------------------------------------------|-------------------------------------------------------------------------------------|--------------------|-----------------|----------------------------|-----------------------------------------|-------------------------------------------------------------------------------------------------------------------------------------------|
|                                                                      |              | Type and source                                          | Definition                                  | Cancer site                                                                         | No. of cases       | No. of controls |                            |                                         |                                                                                                                                           |
| Jordan et al. (2006) [22]                                            | 1966-2005    | Systematic literature review                             | Eight population-based case-control studies | Ovary                                                                               |                    |                 | Never<br>Former<br>Current | 1.0<br>1.0 (0.9-1.2)<br>2.1 (1.7-2.7)   |                                                                                                                                           |
| Seo HS et al. (2005) [32]                                            | 1993-2002    | Korean Medical Insurance Corporation (KMIC)'s dependents | Cohort<br>263,915 women                     | Bladder<br><br>Mean age<br>Never: 54.4±9.6<br>Former: 64.3±8.6<br>Current: 62.2±8.6 |                    |                 | Never<br>Former<br>Current | 1.0<br>1.1 (0.5-2.6)<br>1.6 (0.9-2.7)   | Adjusted for age, sex, Rohrer's index, blood pressure, cholesterol level, blood glucose level, blood pigment, hypertension, diabetes etc. |
| <b>Mortality</b>                                                     |              |                                                          |                                             |                                                                                     |                    |                 |                            |                                         |                                                                                                                                           |
| Jee SH et al. * (2004) [21]<br><i>Re-analysis using updated data</i> | 1993-2001    | National Health Insurance Corporation (NHIC)             | Cohort<br>434,145 women                     | Esophagus<br><br>30 ≤ age ≤95                                                       | 28<br>4<br>4       |                 | Never<br>Former<br>Current | 1.0<br>1.6 (0.6-5.1)<br>0.9 (0.3-2.7)   | Adjusted for age and alcohol                                                                                                              |
|                                                                      |              |                                                          | Cohort<br>434,145 women                     | Stomach<br><br>30 ≤ age ≤95                                                         | 1,322<br>77<br>140 |                 | Never<br>Former<br>Current | 1.0<br>1.0 (0.8-1.2)<br>1.0 (0.8-1.2)   | Adjusted for age, alcohol and diet                                                                                                        |
|                                                                      |              |                                                          | Cohort<br>121,822 women                     | Liver<br><br>30 ≤ age ≤95                                                           | 84<br>1<br>2       |                 | Never<br>Former<br>Current | 1.0<br>1.9 (0.3-14.2)<br>2.6 (0.6-11.0) | Adjusted for age, alcohol and HBV                                                                                                         |
|                                                                      |              |                                                          | Cohort<br>434,145 women                     | Pancreas<br><br>30 ≤ age ≤95                                                        | 503<br>25<br>57    |                 | Never<br>Former<br>Current | 1.0<br>0.9 (0.5-1.2)<br>1.1 (0.8-1.4)   | Adjusted for age and alcohol                                                                                                              |
|                                                                      |              |                                                          | Cohort<br>434,145 women                     | Larynx<br><br>30 ≤ age ≤95                                                          | 13<br>1<br>7       |                 | Never<br>Former<br>Current | 1.0<br>0.9 (0.1-6.9)<br>3.6 (1.3-9.7)   | Adjusted for age and alcohol                                                                                                              |
|                                                                      |              |                                                          | Cohort<br>434,145 women                     | Lung<br><br>30 ≤ age ≤95                                                            | 834<br>79<br>234   |                 | Never<br>Former<br>Current | 1.0<br>1.9 (1.5-2.4)<br>3.2 (2.7-3.7)   | Adjusted for age and alcohol                                                                                                              |

\* Additional analysis results on RR from updated dataset were obtained through personal communication with the author

Supplementary Table 2. Studies included in the meta-analysis for tobacco smoking in Korean women (continued)

| Author (year)                                                           | Study period | Study subjects                               |                         |               |                              |                 | Category of smoking | RR (95% CI)                                                      | Confounding variables considered |
|-------------------------------------------------------------------------|--------------|----------------------------------------------|-------------------------|---------------|------------------------------|-----------------|---------------------|------------------------------------------------------------------|----------------------------------|
|                                                                         |              | Type and source                              | Definition              | Cancer site   | No. of cases                 | No. of controls |                     |                                                                  |                                  |
| Jee SH et al. *<br>(2004) [21]<br><i>Re-analysis using updated data</i> | 1993-2001    | National Health Insurance Corporation (NHIC) | Cohort<br>434,145 women | Cervix        | 176                          | Never           | 1.0                 | Adjusted for age and alcohol                                     |                                  |
|                                                                         |              |                                              |                         | 30 ≤ age ≤95  | 9                            | Former          | 1.2 (0.6-2.4)       |                                                                  |                                  |
|                                                                         |              |                                              |                         | 24            | Current                      | 1.8 (1.1-2.8)   |                     |                                                                  |                                  |
|                                                                         |              |                                              | Cohort<br>434,145 women | Kidney        | 37                           | Never           | 1.0                 | Adjusted for age and alcohol                                     |                                  |
|                                                                         |              |                                              |                         | 30 ≤ age ≤95  | 5                            | Former          | 2.3 (0.9-6.3)       |                                                                  |                                  |
|                                                                         |              |                                              |                         | 6             | Current                      | 1.5 (0.6-3.9)   |                     |                                                                  |                                  |
| Cohort<br>434,145 women                                                 | Bladder      | 48                                           | Never                   | 1.0           | Adjusted for age and alcohol |                 |                     |                                                                  |                                  |
|                                                                         | 30 ≤ age ≤95 | 3                                            | Former                  | 0.7 (0.2-2.2) |                              |                 |                     |                                                                  |                                  |
|                                                                         | 15           | Current                                      | 2.0 (1.1-3.8)           |               |                              |                 |                     |                                                                  |                                  |
| Lee EH et al. *<br>(2010) [27]<br><i>Re-analysis</i>                    | 1993-2004    | Korean Multi-Center Cancer Cohort (KMCC)     | Cohort<br>8,874 women   | Stomach       | 14                           | Never           | 1.00                | Adjusted for age, body mass index and alcohol consumption amount |                                  |
|                                                                         |              |                                              |                         | 40 ≤ age      | 1                            | Former          | 2.85 (0.36-         |                                                                  |                                  |
|                                                                         |              |                                              |                         | 5             | Current                      |                 |                     |                                                                  |                                  |

\* Additional analysis results on RR from updated dataset were obtained through personal communication with the author

Supplementary Table 3. Studies included in the meta-analysis for passive smoking in men

| Cancer site               | Author (year)                                             | Study period                   | Study subjects                                                                                        |                                                                                                                                                                     | No. of cases | No. of controls  | OR (95% CI)                                                                                                                                                                                                                                         | Confounding variables considered                                                                                                                                                                                                                    |
|---------------------------|-----------------------------------------------------------|--------------------------------|-------------------------------------------------------------------------------------------------------|---------------------------------------------------------------------------------------------------------------------------------------------------------------------|--------------|------------------|-----------------------------------------------------------------------------------------------------------------------------------------------------------------------------------------------------------------------------------------------------|-----------------------------------------------------------------------------------------------------------------------------------------------------------------------------------------------------------------------------------------------------|
|                           |                                                           |                                | Type and source                                                                                       | Definition                                                                                                                                                          |              |                  |                                                                                                                                                                                                                                                     |                                                                                                                                                                                                                                                     |
| Lung                      | <b><i>Exposure to smoking at home, Incidence</i></b>      |                                |                                                                                                       |                                                                                                                                                                     |              |                  |                                                                                                                                                                                                                                                     |                                                                                                                                                                                                                                                     |
|                           | Tse LA et al. (2009) [52]                                 | 2004-2006                      | Population-based case-referent                                                                        | Cases: nonsmoker with newly diagnosed primary lung cancer<br>Controls: nonsmoking community referents                                                               | 132          | 536              | 0.90 (0.57-1.41)                                                                                                                                                                                                                                    | Adjusted for age, place of birth, alcohol drinking, residential radon exposure, past history of lung diseases, any cancer in first-degree relatives, intakes of meat, exposure to known or suspected lung carcinogens, and adoption of dust control |
|                           | Akiba S et al. (1986) [37]                                | 1971-1980                      | Radiation Effects Research Foundation (RERF)                                                          | Cases: non-smoking men with newly diagnosed cases of primary lung cancer among cohort members<br>Controls: non-smoking men among cohort members without lung cancer | 19           | 110              | 2.10 (0.33-9.63)                                                                                                                                                                                                                                    | Individually matched for year of birth, city of residence, sex, and whether or not they were among the 20% of the cohort participating in the program of biennial medical examinations given at RERF, and vital status.                             |
|                           | Wang L et al. (2000) [53]                                 | 1994-1998                      | Hospital-based with community control                                                                 | Cases: diagnosed lung cancer among never-smokers<br>Controls: randomly selected from 1990 census lists<br>30 ≤ age ≤ 75                                             | 33           | 114              | 1.22 (0.5-3.3)                                                                                                                                                                                                                                      | Frequency matched for age, sex, and prefecture of current residence                                                                                                                                                                                 |
|                           | <b><i>Exposure to smoking at home, Mortality</i></b>      |                                |                                                                                                       |                                                                                                                                                                     |              |                  |                                                                                                                                                                                                                                                     |                                                                                                                                                                                                                                                     |
|                           | McGhee SM et al. (2005) [48]                              | 1998                           | Death registries                                                                                      | Cases: death from lung cancer among never smoker<br>Controls: never smoking controls                                                                                | 145          | 418              | 1.34 (0.82-2.17)                                                                                                                                                                                                                                    | Adjusted for age, education                                                                                                                                                                                                                         |
|                           | <b><i>Exposure to smoking at workplace, Incidence</i></b> |                                |                                                                                                       |                                                                                                                                                                     |              |                  |                                                                                                                                                                                                                                                     |                                                                                                                                                                                                                                                     |
| Tse LA et al. (2009) [52] | 2004-2006                                                 | Population-based case-referent | Cases: nonsmoker with newly diagnosed primary lung cancer<br>Controls: nonsmoking community referents | 132                                                                                                                                                                 | 536          | 1.15 (0.74-1.77) | Adjusted for age, place of birth, alcohol drinking, residential radon exposure, past history of lung diseases, any cancer in first-degree relatives, intakes of meat, exposure to known or suspected lung carcinogens, and adoption of dust control |                                                                                                                                                                                                                                                     |

Supplementary Table 4. Studies included in the meta-analysis for passive smoking in women

| Cancer site | Author (year)                                        | Study period | Study subjects                                           |                                                                                                                                             |              | OR (95% CI)       | Confounding variables considered                                                                                                                                                 |
|-------------|------------------------------------------------------|--------------|----------------------------------------------------------|---------------------------------------------------------------------------------------------------------------------------------------------|--------------|-------------------|----------------------------------------------------------------------------------------------------------------------------------------------------------------------------------|
|             |                                                      |              | Type and source                                          | Definition                                                                                                                                  | No. of cases |                   |                                                                                                                                                                                  |
| Lung        | <b><i>Exposure to smoking at home, Incidence</i></b> |              |                                                          |                                                                                                                                             |              |                   |                                                                                                                                                                                  |
|             | Jee SH et al. (1999) [40]                            | 1992-1997    | Korea Medical Insurance Corporation (KMIC)               | Cohort<br>157,436 non-smoking wives<br><br>40 ≤ age ≤83                                                                                     | 79           | 1.63 (1.01-2.63)  | Adjusted for the age of husbands and wives, socioeconomic status, residency, husband's vegetable consumption, and husband's occupation.                                          |
|             | Kurahashi N et al. (2008) [42]                       | 1990-1993    | Japan Health Center-based Prospective study (JPHC Study) | Prospective cohort<br>28,414 non-smoking<br><br>40 ≤ age ≤69                                                                                | 109          | 1.24 (0.85-1.81)  | Adjusted for age, study area, alcohol consumption, family history of lung cancer and menopausal status.                                                                          |
|             | Wen W et al. (2006) [56]                             | 1997-2002    | Shanghai Women's Health Study (SWHS)                     | Prospective cohort<br>72,829 non-smoking women                                                                                              | 106          | 1.09 (0.74-1.61)  | Adjusted for education, occupation, family income, physical activity, body mass index, and intake of meat, vegetables, and fruit.                                                |
|             | Nishino Y et al. (2001) [49]                         | 1984-1992    | Population-based                                         | Prospective cohort<br>9,675 lifelong nonsmoking women                                                                                       | 24           | 1.9 (0.81-4.4)    | Adjusted for age                                                                                                                                                                 |
|             | Lee CH et al. (2000) [44]                            | 1992-1998    | Hospital-based                                           | Cases: non-smoking female lung cancer patients<br>Controls: non-smoking women at the same hospital with conditions unrelated to tobacco use | 268          | 445 2.2 (1.5-3.3) | Matched for age. Adjusted for residential area, education, occupation, tuberculosis, cooking fuels and fume extractor.                                                           |
|             | Zhong L et al. (1999) [58]                           | 1992-1994    | Population-based Shanghai Residential Registry           | Cases: non-smoker diagnosed with primary lung cancer<br>Controls: non-smoker selected randomly from the Shanghai Residential Registry       | 504          | 601 1.1 (0.8-1.5) | Adjusted for age, income, intake of vitamin C, respondent status, smokiness of the kitchen during cooking, family history of lung cancer, and potentially high-risk occupations. |

Supplementary Table 4. Studies included in the meta-analysis for passive smoking in women (continued)

| Cancer site | Author (year)                                        | Study period | Study subjects                           |                                                                                                                                                                                                                        | No. of cases | No. of controls | OR (95% CI)      | Confounding variables considered                    |
|-------------|------------------------------------------------------|--------------|------------------------------------------|------------------------------------------------------------------------------------------------------------------------------------------------------------------------------------------------------------------------|--------------|-----------------|------------------|-----------------------------------------------------|
|             |                                                      |              | Type and source                          | Definition                                                                                                                                                                                                             |              |                 |                  |                                                     |
| Lung        | <b><i>Exposure to smoking at home, Incidence</i></b> |              |                                          |                                                                                                                                                                                                                        |              |                 |                  |                                                     |
|             | Rapiti E et al. (1999) [50]                          | 1991-1992    | Hospital-based                           | Cases: non-smoker with newly diagnosed primary lung cancers<br>Controls: non-smoker among patients admitted to the hospital and the patient's visitors                                                                 | 41           | 67              | 1.2 (0.5-2.9)    | Adjusted for age, residence and religion.           |
|             | Wu-Williams AH et al. (1990) [57]                    | 1985-1987    | Cancer registries with community control | Cases: non-smoker with newly diagnosed primary lung cancers in cancer registries of Harbin and Shenyang<br>Controls: non-smoker with randomly selected from the general populations of Harbin and Shenyang<br>50 ≤ age | 417          | 602             | 0.79 (0.61-1.02) |                                                     |
|             | Wang TJ et al. (1996) [55]                           | 1992-1994    | Hospital-based with community control    | Cases: non-smoker with newly diagnosed of primary lung cancer in 18 hospitals of Shenyang<br>Controls: non-smoker with randomly selected from the general population located in urban areas of Shenyang                | 135          | 135             | 1.11 (0.65-1.88) | Matched for age, sex                                |
|             | Liu Q et al. (1993) [46]                             | 1983-1984    | Hospital-based                           | Cases: newly diagnosed cases of primary lung cancer from 8 hospitals<br>Controls: individually matched hospital controls<br>40 ≤ age ≤ 70                                                                              | 38           | 69              | 1.49 (0.37-5.97) | Adjusted for education, occupation, and living area |

Supplementary Table 4. Studies included in the meta-analysis for passive smoking in women (continued)

| Cancer site | Author (year)                                        | Study period | Study subjects                               |                                                                                                                                                                             | No. of cases | No. of controls | OR (95% CI)      | Confounding variables considered                                                                                                                                                                           |
|-------------|------------------------------------------------------|--------------|----------------------------------------------|-----------------------------------------------------------------------------------------------------------------------------------------------------------------------------|--------------|-----------------|------------------|------------------------------------------------------------------------------------------------------------------------------------------------------------------------------------------------------------|
|             |                                                      |              | Type and source                              | Definition                                                                                                                                                                  |              |                 |                  |                                                                                                                                                                                                            |
| Lung        | <b><i>Exposure to smoking at home, Incidence</i></b> |              |                                              |                                                                                                                                                                             |              |                 |                  |                                                                                                                                                                                                            |
|             | Akiba S et al. (1986) [37]                           | 1971-1980    | Radiation Effects Research Foundation (RERF) | Cases: non-smoker with newly diagnosed cases of primary lung cancer among cohort members<br>Controls: non-smoker among cohort members without lung cancer                   | 94           | 270             | 1.51 (0.85-2.77) | Matched for year of birth, city of residence, sex, and whether or not they were among the 20% of the cohort participating in the program of biennial medical examinations given at RERF, and vital status. |
|             | Hirayama T (1984) [39]                               | 1965-1981    | Census-population-based                      | Prospective cohort<br>91,540 nonsmoking wives                                                                                                                               | 200          |                 | 1.59 (1.24-2.05) | Adjusted for age                                                                                                                                                                                           |
|             | Lam TH et al. (1987) [43]                            | 1983-1986    | Hospital-based                               | Cases: non-smoking lung cancer patients<br>Controls: non-smoking healthy neighborhood controls matched for age                                                              | 199          | 335             | 1.65 (1.16-2.35) | Matched for age                                                                                                                                                                                            |
|             | Liu ZY et al. (1991) [47]                            |              | Population-based                             | Cases: newly-diagnosed lung cancer patients<br>Controls:                                                                                                                    | 110 (total)  | 426 (total)     | 0.77 (0.30-1.96) | Matched for age, sex, occupation, and village of residence                                                                                                                                                 |
|             | Fang J et al. (2006) [38]                            | 2001-2004    | Hospital-based                               | Cases: no-smoking female patients with the primary lung cancer from hospitals in Beijing, Shanghai and Chengdu<br>Controls: one hospital control and one population control |              |                 | 1.77 (1.07-2.92) | Matched for age, sex and no-smoking. Adjusted for consumption of internal organ, consumption of vegetables, taking vitamins often, average month income, and the first procreation age                     |
|             | Wang L et al. (2000) [53]                            | 1994-1998    | Hospital-based with community control        | Cases: diagnosed lung cancer among never-smokers<br>Controls: randomly selected from 1990 census lists                                                                      | 200          | 407             | 1.15 (0.6-2.1)   | Frequency matched for age, sex, and prefecture of current residence                                                                                                                                        |



Supplementary Table 4. Studies included in the meta-analysis for passive smoking in women (continued)

| Cancer site | Author (year)                                        | Study period | Study subjects                        |                                                                                                               | No. of cases | No. of controls | OR (95% CI)      | Confounding variables considered                                                                                            |
|-------------|------------------------------------------------------|--------------|---------------------------------------|---------------------------------------------------------------------------------------------------------------|--------------|-----------------|------------------|-----------------------------------------------------------------------------------------------------------------------------|
|             |                                                      |              | Type and source                       | Definition                                                                                                    |              |                 |                  |                                                                                                                             |
| Lung        | <b><i>Exposure to smoking at home, Incidence</i></b> |              |                                       |                                                                                                               |              |                 |                  |                                                                                                                             |
|             | Shimizu H et al. (1988) [51]                         | 1982-1985    | Hospital-based                        | Cases: nonsmoking lung cancer patients<br>Controls: in-patients other than those with lung cancer<br>30 ≤ age | 90           | 163             | 1.08 (0.64-1.82) | Matched hospital, age, date of admission                                                                                    |
|             | Koo et al. (1987) [41]                               | 1981-1983    | Hospital-based with community control | Cases: never-smoked female lung cancer patients<br>Controls: never-smoked district controls                   | 86           | 136             | 1.64 (0.87-3.09) | Adjusted for age, number of live births, schooling, years since exposure to cigarette smoke ceased in the home or workplace |
|             | <b><i>Exposure to smoking at home, Mortality</i></b> |              |                                       |                                                                                                               |              |                 |                  |                                                                                                                             |
|             | Lei YX et al. (1996) [45]                            | 1986         | Population-based                      | Cases: lung cancer deaths in non-smoker<br>Controls: non-tumor deaths in non-smoker                           | 75           | 128             | 1.19 (0.66-2.16) | Matched for sex, age, year of death, and residence                                                                          |
|             | McGhee SM et al. (2005) [48]                         | 1998         | Death registries                      | Cases: deaths from lung cancer among never smoker<br>Controls: deaths among never smoking without lung cancer | 179          | 345             | 1.38 (0.94-2.04) | Adjusted for age, education                                                                                                 |

Supplementary Table 4. Studies included in the meta-analysis for passive smoking in women (continued)

| Cancer site | Author (year)                                             | Study period | Study subjects                                           |                                                                                                                                                                                                            |              | OR (95% CI) | Confounding variables considered |                                                                                                                                                                                                                                    |
|-------------|-----------------------------------------------------------|--------------|----------------------------------------------------------|------------------------------------------------------------------------------------------------------------------------------------------------------------------------------------------------------------|--------------|-------------|----------------------------------|------------------------------------------------------------------------------------------------------------------------------------------------------------------------------------------------------------------------------------|
|             |                                                           |              | Type and source                                          | Definition                                                                                                                                                                                                 | No. of cases |             |                                  | No. of controls                                                                                                                                                                                                                    |
| Lung        | <b><i>Exposure to smoking at workplace, Incidence</i></b> |              |                                                          |                                                                                                                                                                                                            |              |             |                                  |                                                                                                                                                                                                                                    |
|             | Kurahashi N et al. (2008) [42]                            | 1990-1993    | Japan Health Center-based Prospective study (JPHC Study) | Prospective cohort<br>28,414 non-smoking                                                                                                                                                                   | 109          |             | 1.32 (0.85-2.04)                 | Adjusted for age, study area, alcohol consumption, family history of lung cancer and menopausal status.                                                                                                                            |
|             | Wen W et al. (2006) [56]                                  | 1997-2002    | Shanghai Women's Health Study (SWHS)                     | Prospective cohort<br>72,829 non-smoking women                                                                                                                                                             | 106          |             | 1.79 (1.09-2.93)                 | Adjusted for education, occupation, family income, physical activity, body mass index, and intake of meat, vegetables, and fruit.                                                                                                  |
|             | Lee CH et al. (2000) [44]                                 | 1992-1998    | Hospital-based                                           | Cases: non-smoking female lung cancer patients<br>Controls: non-smoking women at the same hospital with conditions unrelated to tobacco use                                                                | 268          | 445         | 1.2 (0.5-2.4)                    | Matched for age. Adjusted for residential area, education, occupation, tuberculosis, cooking fuels and fume extractor.                                                                                                             |
|             | Zhong L et al. (1999) [58]                                | 1992-1994    | Population-based Shanghai Residential Registry           | Cases: non-smoking women diagnosed with primary lung cancer<br>Controls: non-smoking women selected randomly from the Shanghai Residential Registry                                                        | 504          | 601         | 1.7 (1.3-2.3)                    | Adjusted for age, income, intake of vitamin C, respondent status, smokiness of the kitchen during cooking, family history of lung cancer, potentially high-risk occupations, and domestic exposure to environmental tobacco smoke. |
|             | Wu-Williams AH et al. (1990) [57]                         | 1985-1987    | Cancer registries with community control                 | Cases: non-smoker with newly diagnosed primary lung cancers in cancer registries of Harbin and Shenyang<br>Controls: non-smoker with randomly selected from the general populations of Harbin and Shenyang | 415          | 602         | 1.21 (0.94-1.58)                 |                                                                                                                                                                                                                                    |

Supplementary Table 4. Studies included in the meta-analysis for passive smoking in women (continued)

| Cancer site | Author (year)                                             | Study period | Study subjects                        |                                                                                                                                                                                                        |              | OR (95% CI) | Confounding variables considered |                                          |
|-------------|-----------------------------------------------------------|--------------|---------------------------------------|--------------------------------------------------------------------------------------------------------------------------------------------------------------------------------------------------------|--------------|-------------|----------------------------------|------------------------------------------|
|             |                                                           |              | Type and source                       | Definition                                                                                                                                                                                             | No. of cases |             |                                  | No. of controls                          |
| Lung        | <b><i>Exposure to smoking at workplace, Incidence</i></b> |              |                                       |                                                                                                                                                                                                        |              |             |                                  |                                          |
|             | Wang TJ et al. (1996) [55]                                | 1992-1994    | Hospital-based with community control | Cases: nonsmoker with newly diagnosed of primary lung cancer in 18 hospitals of Shenyang<br>Controls: non-smoker with randomly selected from the general population located in urban areas of Shenyang | 135          | 135         | 0.89 (0.45-1.77)                 | Matched for age, sex                     |
|             | Shimizu H et al. (1988) [51]                              | 1982-1985    | Hospital-based                        | Cases: nonsmoking lung cancer patients<br>Controls: in-patients other than those with lung cancer                                                                                                      | 90           | 163         | 1.20 (0.70-2.04)                 | Matched hospital, age, date of admission |

Supplementary Table 5. Estimation of cancer incident cases and deaths attributable to passive smoking among non-smokers

|                                                                                                | Lung cancer incidence |        | Lung cancer mortality |        |
|------------------------------------------------------------------------------------------------|-----------------------|--------|-----------------------|--------|
|                                                                                                | Men                   | Women  | Men                   | Women  |
| Prevalence of tobacco smoking                                                                  |                       |        |                       |        |
| % Current smokers                                                                              | 70.8                  | 3.9    | 70.8                  | 3.9    |
| % Former smokers                                                                               | 11.7                  | 0.3    | 11.7                  | 0.3    |
| (A) % Never-smokers                                                                            | 17.5                  | 95.8   | 17.5                  | 95.8   |
| AF estimate for secondhand smoking among never-smokers                                         |                       |        |                       |        |
| Exposure to smoking at home                                                                    |                       |        |                       |        |
| % Never-smokers exposed to smoking at home                                                     | 14.8                  | 60.1   | 14.8                  | 60.1   |
| RR for lung cancer                                                                             | 1.00                  | 1.32   | 1.34                  | 1.32   |
| (B) PAF (%)                                                                                    | 0.0                   | 16.3   | 4.8                   | 16.1   |
| Exposure to smoking at workplace                                                               |                       |        |                       |        |
| % Never-smokers exposed to smoking at workplace                                                | 42.2                  | 14.7   | 42.2                  | 14.7   |
| RR for lung cancer                                                                             | 1.15                  | 1.37   | 1.15                  | 1.37   |
| (C) PAF (%)                                                                                    | 5.9                   | 5.2    | 5.9                   | 5.2    |
| Exposure to smoking at home or workplace                                                       |                       |        |                       |        |
| (D) PAF (%), (D)=(B)+(C)-(B)*(C)                                                               | 5.9                   | 20.7   | 10.5                  | 20.5   |
| Number of cases attributable to secondhand smoking                                             |                       |        |                       |        |
| (E) Total number of lung cancer cases in 2009                                                  | 13,580                | 5,298  | 10,892                | 4,025  |
| (F) Lung cancer cases in smokers attributable to smoking                                       | 7,244                 | 278    | 7,783                 | 327    |
| (G) Lung cancer cases not attributable to smoking, (G)=(E)-(F)                                 | 6,336                 | 5,020  | 3,109                 | 3,698  |
| (H) Lung cancer cases among never-smokers, (H)=(G)*(A)/100                                     | 1,109                 | 4,809  | 544                   | 3,543  |
| (I) Lung cancer cases attributable to secondhand smoking at home, (I)=(H)*(B)/100              | 0                     | 783    | 26                    | 571    |
| (J) Lung cancer cases attributable to secondhand smoking at workplace, (J)=(H)*(C)/100         | 66                    | 251    | 32                    | 185    |
| (K) Lung cancer cases attributable to secondhand smoking at home or workplace, (K)=(H)*(D)/100 | 66                    | 994    | 57                    | 726    |
| (L) Total number of all cancer cases in 2009                                                   | 96,826                | 91,068 | 43,658                | 25,773 |
| Exposure to smoking at home                                                                    |                       |        |                       |        |
| % of lung cancer, (I)/(E) *100                                                                 | 0.0                   | 14.8   | 0.2                   | 14.2   |
| % of all cancers, (I)/(L) *100                                                                 | 0.0                   | 0.9    | 0.1                   | 2.2    |
| Exposure to smoking at workplace                                                               |                       |        |                       |        |
| % of lung cancer, (J)/(E) *100                                                                 | 0.5                   | 4.7    | 0.3                   | 4.6    |
| % of all cancers, (J)/(L) *100                                                                 | 0.1                   | 0.3    | 0.1                   | 0.7    |
| Exposure to smoking at home or workplace                                                       |                       |        |                       |        |
| % of lung cancer, (K)/(E) *100                                                                 | 0.5                   | 18.8   | 0.5                   | 18.0   |
| % of all cancers, (K)/(L) *100                                                                 | 0.1                   | 1.1    | 0.1                   | 2.8    |

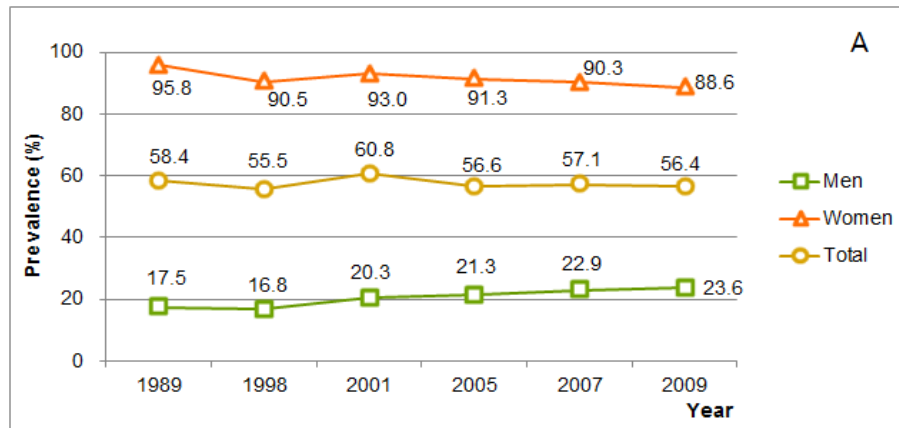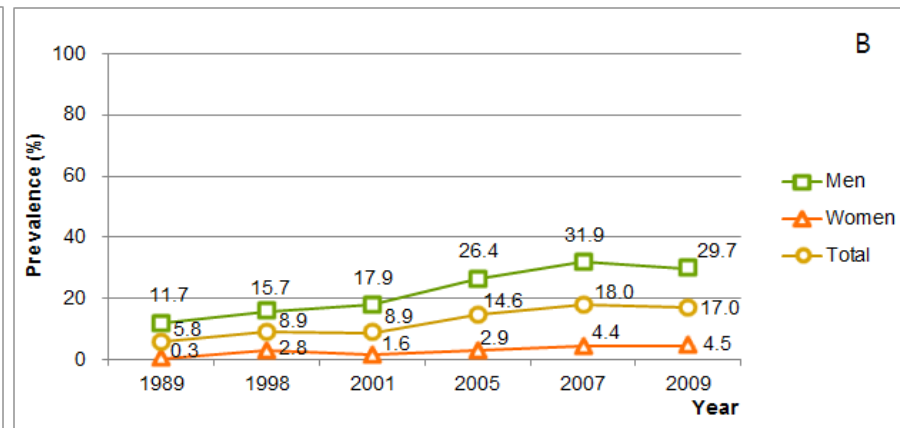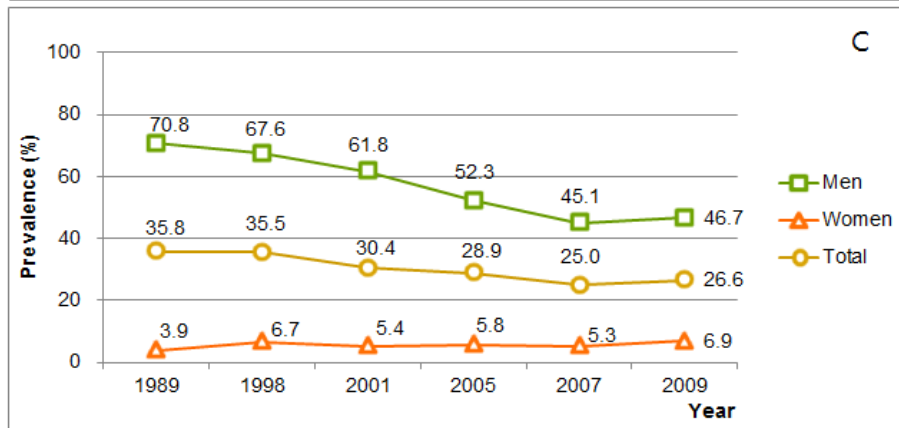

Supplementary Figure 1. Prevalence (%) of tobacco smoking. A) Never smoker, B) Former smoker, C) Current smoker

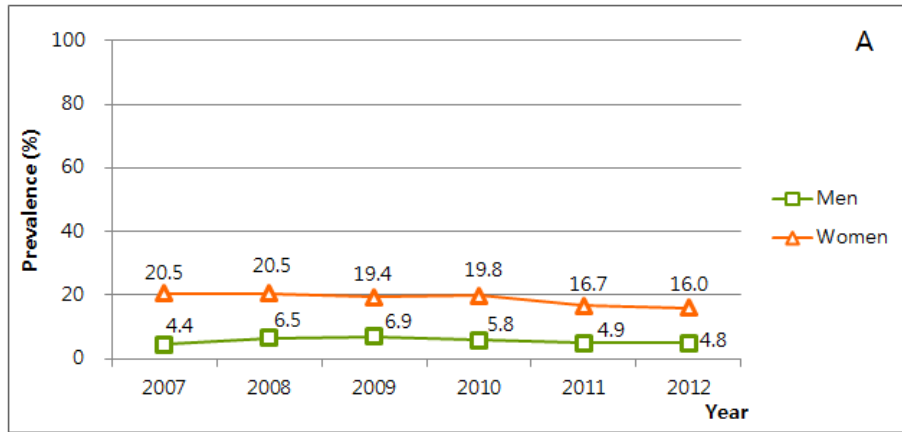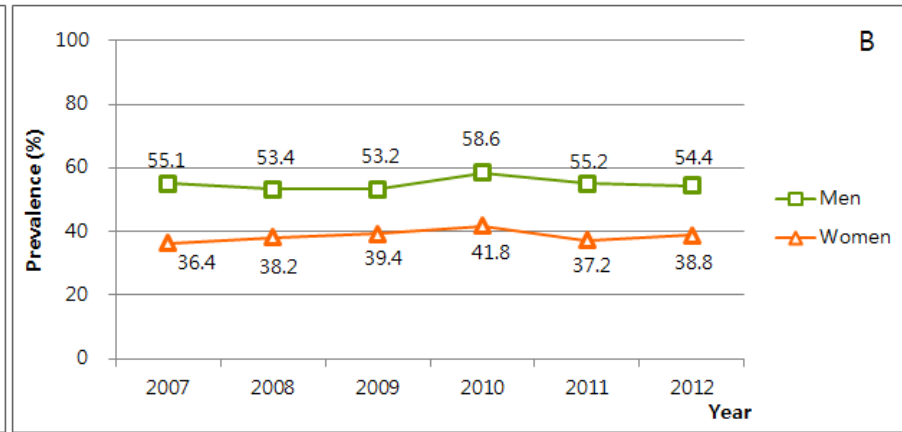

Supplementary Figure 2. Prevalence (%) of passive smoking A) At home, B) At workplace

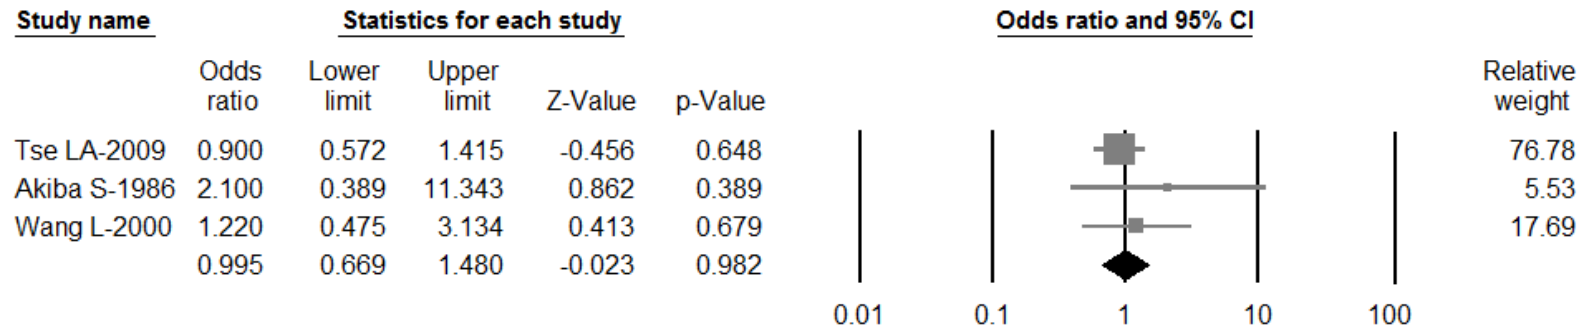

Footnote

Heterogeneity:  $\chi^2 = 1.12$  (d.f. = 2)  $p = 0.571$ ;  $I^2 = 0.0\%$ ; Fixed effect estimate was selected.

Supplementary Figure 3. Meta-analysis on passive smoking at home and lung cancer incidence in men.

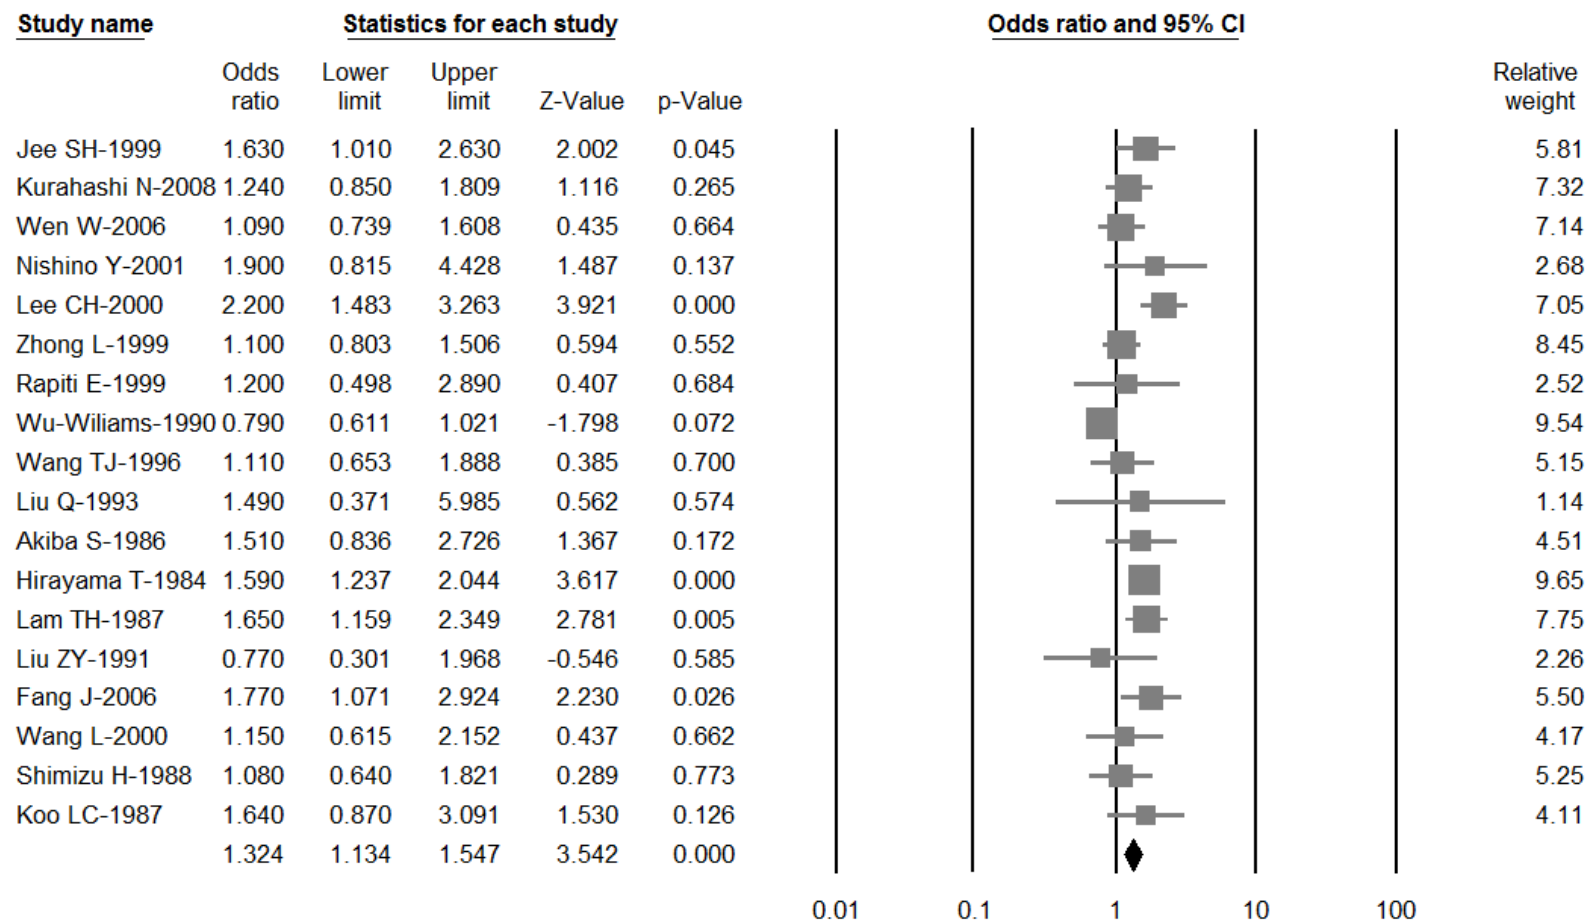

Footnote

Heterogeneity:  $\chi^2 = 33.50$  (d.f. = 17)  $p = 0.010$ ;  $I^2 = 49.2\%$ ; Random effect estimate was selected.

Supplementary Figure 4. Meta-analysis on passive smoking at home and lung cancer incidence in women.



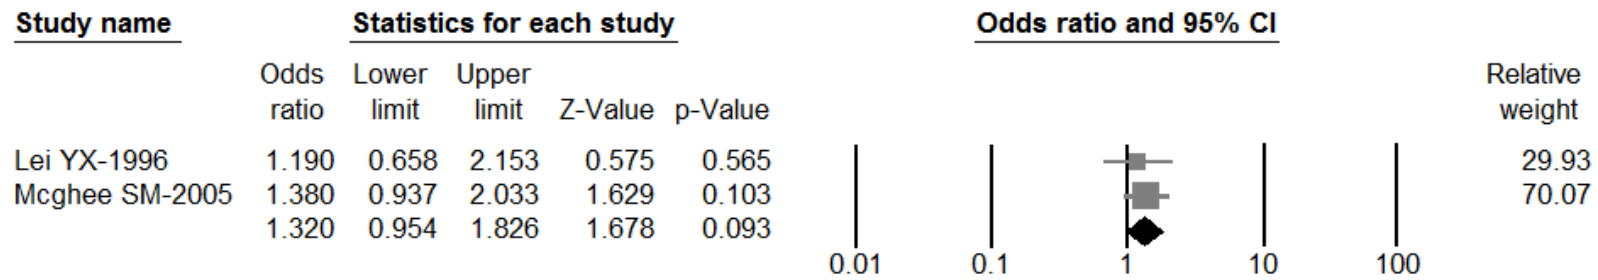

Footnote

Heterogeneity:  $\chi^2 = 0.17$  (d.f. = 1)  $p = 0.682$ ;  $I^2 = 0.0\%$ ; Fixed effect estimate was selected.

Supplementary Figure 5. Meta-analysis on passive smoking at home and lung cancer mortality in women.

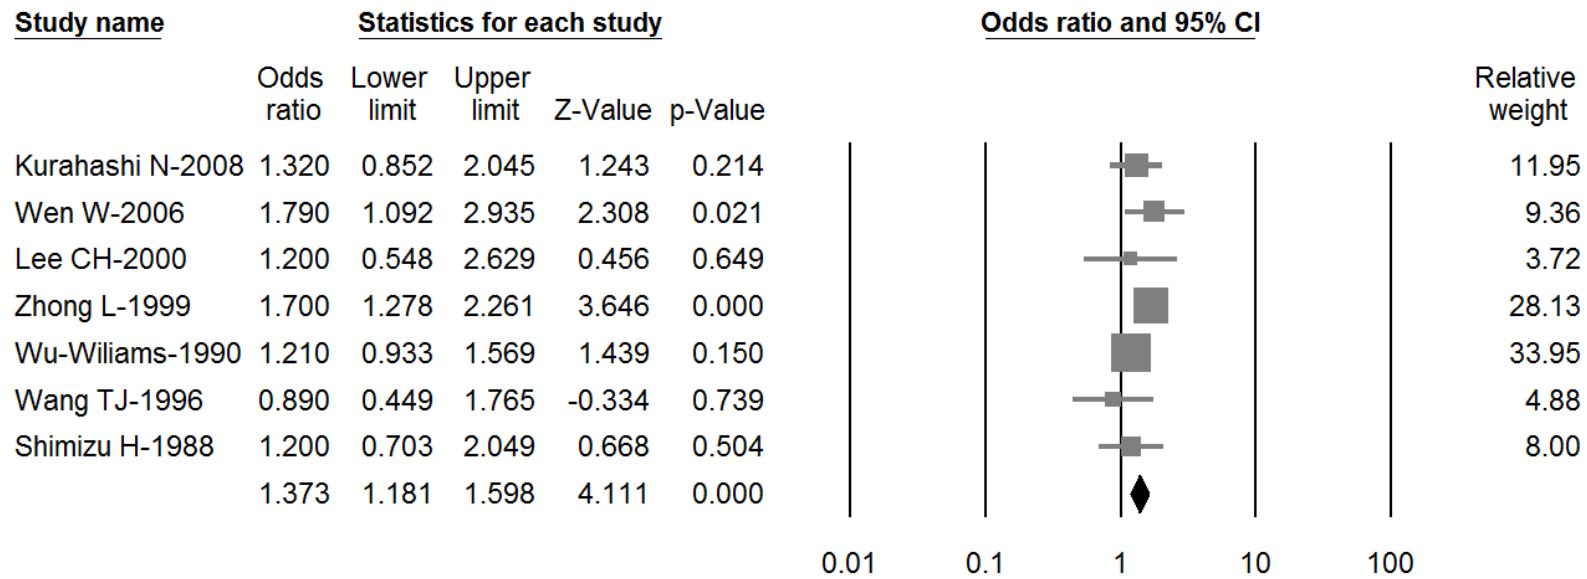

Footnote

Heterogeneity:  $\chi^2 = 6.10$  (d.f. = 6)  $p = 0.412$ ;  $I^2 = 1.6\%$ ; Fixed effect estimate was selected.

Supplementary Figure 6. Meta-analysis on passive smoking at workplace and lung cancer incidence in women.
